# Supplementary material
Source: PubMed Central journal article supplement (PMC5394877)
Supplement: 7f21be3919dca0df2282654ffc53b507_2016_147595-Disclosures_and_Contributions.pdf [file 7f21be3919dca0df2282654ffc53b507_2016_147595-Disclosures_and_Contributions.pdf]

Haematologica  
HAEMATOL/2016/147595  
Version 3

Osteonecrosis in children with acute lymphoblastic leukemia

Marina Kunstreich, Sebastian Kummer, Hans-Juergen Laws, Arndt  
Borkhardt, and Michaela Kuhlen

Disclosures: Michaela Kuhlen is supported by German Childhood Cancer Foundation (DKS 2011.11).

Contributions: Marina Kunstreich and Michaela Kuhlen screened the literature, collected the data, and drafted the manuscript. Sebastian Kummer screened the literature on hormonal changes during puberty and critically revised the manuscript. Hans-Juergen Laws critically revised the manuscript. Arndt Borkhardt critically revised the manuscript for important intellectual content. Michaela Kuhlen supervised the project. All authors read and approved the final manuscript.
